# Supplementary material for: Effectively improving the energy of monocyclic imidazoles to a high level by the introduction of bridge-rings and nitro groups through different kinds of Diels–Alder reactions: a DFT study
Source: Royal Society of Chemistry journal article supplement (doi:10.1039/d0me00075b), 2020-01-01
Supplement: d0me00075b1.pdf [file d0me00075b1.pdf]

### Supporting Information

#### **Effectively improving the energy of monocyclic imidazoles to high level by the introduction of bridge-rings and nitro groups through different kinds of Diels-Alder reactions: a DFT study**

Qiong Wu<sup>1,\*</sup>, Qinnan Hu<sup>1</sup>, Mingquan Li<sup>1</sup>, Zewu Zhang<sup>1</sup>, and Weihua Zhu<sup>2</sup>,

*<sup>1</sup> Jiangsu Key Laboratory of Advanced Structural Materials and Application Technology, School of Materials Science and Engineering, Nanjing Institute of Technology, 1 Hongjing Road, Nanjing 211167, China*

*<sup>2</sup> Institute for Computation in Molecular and Materials Science and Department of Chemistry, Nanjing University of Science and Technology, Nanjing 210094, China*

**Table S1** The energy barrier for the normal Diels-Alder reaction

|     | DAE  | TAE  | DNE  | TNE  | DAA   | DNA  |
|-----|------|------|------|------|-------|------|
| DE1 | 8.45 | 8.47 | 3.40 | 1.58 | 8.76  | 2.91 |
| DE2 | 8.70 | 8.72 | 3.65 | 1.83 | 9.01  | 3.16 |
| DE3 | 9.62 | 9.64 | 4.57 | 2.75 | 9.93  | 4.08 |
| DE4 | 9.76 | 9.78 | 4.71 | 2.89 | 10.07 | 4.22 |
| DE5 | 9.85 | 9.87 | 4.80 | 2.98 | 10.16 | 4.31 |
| DE6 | 9.97 | 9.99 | 4.92 | 3.10 | 10.28 | 4.43 |

**Table S2** The energy barrier for the inverse Diels-Alder reaction

|     | DAE  | TAE  | DNE  | TNE  | DAA  | DNA  |
|-----|------|------|------|------|------|------|
| DE1 | 2.16 | 2.20 | 6.24 | 7.02 | 3.05 | 6.84 |
| DE2 | 0.54 | 0.58 | 4.62 | 5.40 | 1.43 | 5.22 |
| DE3 | 1.07 | 1.11 | 5.15 | 5.93 | 1.96 | 5.75 |
| DE4 | 0.51 | 0.55 | 4.59 | 5.37 | 1.40 | 5.19 |
| DE5 | 1.14 | 1.18 | 5.22 | 6.00 | 2.03 | 5.82 |
| DE6 | 0.29 | 0.33 | 4.37 | 5.15 | 1.18 | 4.97 |

**Table S3** The energy barrier of LUMO→LUMO for the neutral Diels-Alder reaction

|     | DAE  | TAE  | DNE  | TNE  | DAA  | DNA  |
|-----|------|------|------|------|------|------|
| DE1 | 4.06 | 4.08 | 0.99 | 2.81 | 4.37 | 1.48 |
| DE2 | 5.68 | 5.70 | 0.63 | 1.19 | 5.99 | 0.14 |
| DE3 | 5.15 | 5.17 | 0.10 | 1.72 | 5.46 | 0.39 |
| DE4 | 5.71 | 5.73 | 0.66 | 1.16 | 6.02 | 0.17 |
| DE5 | 5.08 | 5.10 | 0.03 | 1.79 | 5.39 | 0.46 |
| DE6 | 5.93 | 5.95 | 0.88 | 0.94 | 6.24 | 0.39 |

**Table S4** The energy barrier of HOMO→HOMO for the neutral Diels-Alder reaction

|     | DAE  | TAE  | DNE  | TNE  | DAA  | DNA  |
|-----|------|------|------|------|------|------|
| DE1 | 2.23 | 2.19 | 1.85 | 2.63 | 1.34 | 2.45 |
| DE2 | 2.48 | 2.44 | 1.60 | 2.38 | 1.59 | 2.20 |
| DE3 | 3.40 | 3.36 | 0.68 | 1.46 | 2.51 | 1.28 |
| DE4 | 3.54 | 3.50 | 0.54 | 1.32 | 2.65 | 1.14 |
| DE5 | 3.63 | 3.59 | 0.45 | 1.23 | 2.74 | 1.05 |
| DE6 | 3.75 | 3.71 | 0.33 | 1.11 | 2.86 | 0.93 |

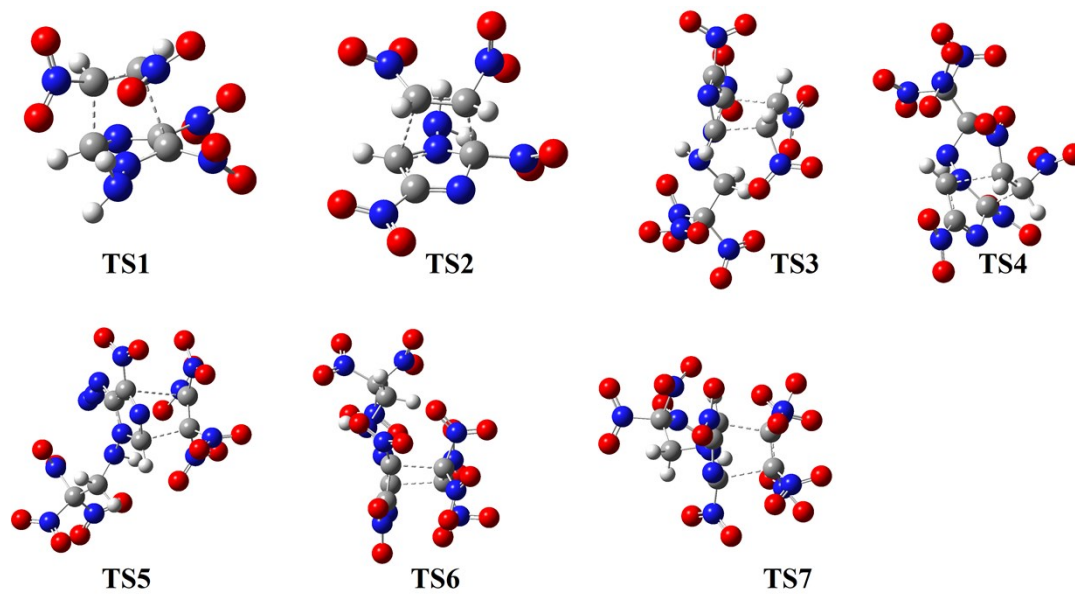

**Fig. S1** The optimized structures of transition states (TS) to form the corresponding product (for example, from TS1 to P1, from TS2 to P2, and so forth)

## The coordinates of all designed compounds

### P1

|   |             |             |             |
|---|-------------|-------------|-------------|
| C | 1.49023000  | -0.85808600 | -0.24638600 |
| N | 0.95668000  | -2.00119300 | -0.11721300 |
| C | -0.36014600 | -1.66820300 | 0.53287700  |
| C | -1.19747500 | -1.05762300 | -0.61366400 |
| C | -0.56997400 | 0.37089900  | -0.76871800 |
| C | 0.57132500  | 0.25511400  | 0.28827500  |
| N | 2.69775300  | -0.63455600 | -1.04635100 |
| O | 2.58066300  | 0.28734900  | -1.85500300 |
| O | 3.65789700  | -1.36086600 | -0.87583700 |
| N | 1.27466900  | 1.49410800  | 0.75564900  |
| O | 0.60262400  | 2.50138500  | 0.89797300  |
| O | 2.46942000  | 1.35899500  | 0.98814400  |
| N | -1.53620700 | 1.51932900  | -0.47553400 |
| O | -1.51706100 | 2.42257200  | -1.29687000 |
| O | -2.22893200 | 1.44612500  | 0.52555000  |
| N | -2.69164900 | -1.06918500 | -0.34791500 |
| O | -3.09245000 | -1.64134600 | 0.65380500  |
| O | -3.37257000 | -0.55427500 | -1.22393300 |
| N | -0.12336300 | -0.47068100 | 1.36120500  |
| N | 0.62824400  | -0.59519500 | 2.54673300  |
| H | -0.80486400 | -2.50653000 | 1.06015500  |
| H | -1.09200500 | -1.61901900 | -1.54244700 |
| H | -0.18907800 | 0.57415000  | -1.76578200 |
| H | 1.26950400  | -1.38962500 | 2.53092400  |
| H | -0.02692900 | -0.68947900 | 3.31620300  |

### P2

|   |            |             |             |
|---|------------|-------------|-------------|
| C | 1.85179900 | -0.11034300 | -0.10128700 |
| N | 1.30436100 | -1.12112200 | -0.64274300 |

|           |             |             |             |
|-----------|-------------|-------------|-------------|
| C         | -0.08468500 | -1.03176500 | -0.08110100 |
| C         | -0.77747100 | 0.11162700  | -0.86851300 |
| C         | -0.05483200 | 1.36032600  | -0.27149500 |
| C         | 0.87723200  | 0.68143700  | 0.77994500  |
| N         | 3.20340800  | 0.33631700  | -0.45464400 |
| O         | 3.30450400  | 1.56064900  | -0.55172600 |
| O         | 4.07568000  | -0.49887300 | -0.61324700 |
| N         | -0.95287900 | 2.38389300  | 0.40742900  |
| O         | -1.74891700 | 1.98576600  | 1.24455700  |
| O         | -0.75484800 | 3.54537400  | 0.07760900  |
| N         | -2.28753700 | 0.15194500  | -0.70442500 |
| O         | -2.82341400 | -0.70053800 | -0.01718600 |
| O         | -2.83386400 | 1.04521700  | -1.33628800 |
| N         | 0.02607700  | -0.42286100 | 1.25251400  |
| N         | 0.62470800  | -1.13515500 | 2.32340600  |
| N         | -0.73917000 | -2.38228500 | -0.20755900 |
| O         | -1.04498200 | -2.69451600 | -1.34798600 |
| O         | -0.85403500 | -3.06014400 | 0.80150800  |
| H         | -0.61947500 | 0.02220500  | -1.94179200 |
| H         | 0.49445600  | 1.93081000  | -1.01547900 |
| H         | 1.27989600  | 1.31427100  | 1.56632900  |
| H         | 1.28768100  | -1.83696700 | 1.98442600  |
| H         | -0.12858500 | -1.63661900 | 2.78544800  |
| <b>P3</b> |             |             |             |
| C         | -2.06345900 | 1.48678600  | -0.91193700 |
| N         | -1.74813700 | 0.96095200  | -2.01885400 |
| C         | -1.12382700 | -0.33756000 | -1.60061800 |
| C         | -2.31819400 | -1.22954300 | -1.18779700 |
| C         | -2.75400100 | -0.59382700 | 0.18014800  |
| C         | -1.71868600 | 0.56206700  | 0.27001300  |

|   |             |             |             |
|---|-------------|-------------|-------------|
| N | -2.88073800 | 2.69984600  | -0.79003900 |
| O | -3.67279100 | 2.66058500  | 0.15473300  |
| O | -2.72805700 | 3.59234500  | -1.60108800 |
| N | -0.51278000 | -0.10919700 | -0.27932900 |
| N | 0.71842100  | 0.55562000  | -0.29946400 |
| C | 1.63535200  | 0.04917200  | 0.71658300  |
| N | -2.68020600 | -1.56203700 | 1.36241900  |
| O | -1.57993300 | -1.98617400 | 1.68494000  |
| O | -3.75191900 | -1.82889000 | 1.87572900  |
| N | -1.94048400 | -2.69981000 | -1.08903700 |
| O | -0.82495900 | -3.03269200 | -1.45486200 |
| O | -2.83721900 | -3.43260400 | -0.69335200 |
| C | 3.06071200  | 0.02533500  | 0.16304800  |
| N | 3.99701300  | -0.79160400 | 1.05749300  |
| O | 3.86017900  | -0.56660200 | 2.25201700  |
| O | 4.78029700  | -1.54847300 | 0.51973700  |
| N | 3.68473600  | 1.42532700  | 0.07100500  |
| O | 4.89751200  | 1.48959400  | 0.12060500  |
| O | 2.89149500  | 2.34820800  | -0.05613700 |
| N | 3.07902200  | -0.58526800 | -1.24252500 |
| O | 2.57071200  | -1.69037000 | -1.31229800 |
| O | 3.56500200  | 0.08081700  | -2.13772600 |
| N | -1.53555000 | 1.25647300  | 1.57819000  |
| O | -2.13880200 | 0.84215800  | 2.55144900  |
| O | -0.76452800 | 2.21576100  | 1.53690400  |
| H | -0.43852500 | -0.74592900 | -2.33562000 |
| H | -3.13717600 | -1.20632500 | -1.90671300 |
| H | -3.77953700 | -0.23431300 | 0.18391200  |
| H | 0.64818000  | 1.57057500  | -0.27883200 |
| H | 1.35109200  | -0.98126900 | 0.93676000  |

|           |             |             |             |
|-----------|-------------|-------------|-------------|
| H         | 1.64360700  | 0.62126700  | 1.64963400  |
| <b>P4</b> |             |             |             |
| C         | -1.82920200 | 1.83138900  | -0.26917800 |
| N         | -2.31071800 | 1.21726100  | -1.27051900 |
| C         | -1.72023500 | -0.14360600 | -1.09438900 |
| C         | -2.55750600 | -0.77458400 | 0.05468100  |
| C         | -1.99615600 | -0.00391000 | 1.28960500  |
| C         | -0.94769700 | 0.92624600  | 0.60736100  |
| N         | -2.24963200 | 3.18520100  | 0.10966900  |
| O         | -2.37113500 | 3.33466500  | 1.32690700  |
| O         | -2.43606600 | 4.00931800  | -0.76677300 |
| N         | -0.40626300 | 0.03939800  | -0.45256500 |
| N         | 0.53376700  | 0.67712100  | -1.31730400 |
| C         | 1.80073700  | 0.00057400  | -1.42998000 |
| N         | -1.32890700 | -0.85877900 | 2.35772700  |
| O         | -0.58432100 | -1.75573900 | 1.99262600  |
| O         | -1.57415900 | -0.52738200 | 3.50831500  |
| N         | -2.47716200 | -2.28489500 | 0.18586000  |
| O         | -1.80970700 | -2.90666300 | -0.62151500 |
| O         | -3.16061900 | -2.73828100 | 1.09279800  |
| C         | 2.76879500  | 0.03249700  | -0.21580900 |
| N         | 4.11611000  | -0.63348700 | -0.57168600 |
| O         | 4.47408300  | -0.48870300 | -1.73046000 |
| O         | 4.70333200  | -1.20182800 | 0.32723000  |
| N         | 2.20221600  | -0.74477900 | 0.97571700  |
| O         | 2.04629900  | -1.92927500 | 0.75812400  |
| O         | 1.95321200  | -0.11874400 | 1.99432700  |
| N         | 3.12043800  | 1.45417800  | 0.23611700  |
| O         | 4.29423600  | 1.71147400  | 0.41838100  |
| O         | 2.17336800  | 2.22486300  | 0.36384000  |



|   |             |             |             |
|---|-------------|-------------|-------------|
| N | -1.76267700 | -0.89901900 | -2.40102100 |
| O | -2.89150700 | -1.03471100 | -2.85119600 |
| O | -0.71769400 | -1.29127800 | -2.88588800 |
| H | -3.61815100 | -0.57642400 | -0.09161600 |
| H | -2.75352900 | 0.56164700  | 1.82592800  |
| H | -0.20792900 | 1.38350800  | 1.26027700  |
| H | 0.64319100  | 1.66297500  | -1.10034500 |
| H | 2.34656700  | 0.44171800  | -2.26715000 |
| H | 1.62266400  | -1.05220200 | -1.65852600 |

**P5**

|   |             |             |             |
|---|-------------|-------------|-------------|
| C | -0.63679700 | 1.44388600  | -0.75289800 |
| N | -0.69816400 | 0.76899700  | -1.82273000 |
| C | -0.85542000 | -0.62317100 | -1.32983500 |
| C | -2.28650000 | -0.85102100 | -0.78610500 |
| C | -2.32877200 | 0.08820100  | 0.46536500  |
| C | -0.77383400 | 0.56739800  | 0.51283400  |
| N | -0.42163000 | 2.89532200  | -0.73373600 |
| O | -1.23262300 | 3.54420900  | -0.08779100 |
| O | 0.56165100  | 3.30451100  | -1.33640400 |
| N | -0.18612600 | -0.68925200 | -0.00612300 |
| N | 1.19089200  | -0.86610600 | 0.14012200  |
| C | 2.10643200  | -0.21143700 | -0.80596500 |
| N | -2.77604100 | -0.63217400 | 1.75317100  |
| O | -1.89019400 | -1.19095500 | 2.38476300  |
| O | -3.96080800 | -0.60698900 | 2.00242100  |
| N | -2.42102500 | -2.38376100 | -0.43332900 |
| O | -1.56322200 | -3.11581900 | -0.89869000 |
| O | -3.39419400 | -2.70812000 | 0.21512900  |
| N | -3.19723300 | 1.35193100  | 0.35274500  |
| O | -3.47441400 | 1.72912900  | -0.77728100 |

|           |             |             |             |
|-----------|-------------|-------------|-------------|
| O         | -3.41849500 | 1.92410000  | 1.39997900  |
| N         | -3.41265200 | -0.67114100 | -1.82139600 |
| O         | -3.04080500 | -0.58782000 | -2.98035100 |
| O         | -4.54883300 | -0.71384600 | -1.39178300 |
| C         | 3.53307700  | -0.27662400 | -0.26646700 |
| N         | 4.47008000  | 0.64213100  | -1.06822900 |
| O         | 4.31335400  | 0.57391400  | -2.27837700 |
| O         | 5.27222800  | 1.30764000  | -0.44649200 |
| N         | 4.15721500  | -1.67733100 | -0.35028600 |
| O         | 3.36677800  | -2.61209900 | -0.29976700 |
| O         | 5.36596200  | -1.73442000 | -0.44584300 |
| N         | 3.57314800  | 0.16524700  | 1.20317100  |
| O         | 3.08597300  | 1.26415000  | 1.40364500  |
| O         | 4.05814200  | -0.60758300 | 2.00675400  |
| N         | -0.27368400 | 1.19084500  | 1.67617700  |
| N         | 0.22278700  | 0.47239500  | 2.57349600  |
| N         | 0.72144400  | 0.00828200  | 3.47549000  |
| H         | -0.53833900 | -1.36638200 | -2.05214600 |
| H         | 1.37261100  | -1.86332100 | 0.20123600  |
| H         | 1.86446100  | 0.85021700  | -0.88062900 |
| H         | 2.10507800  | -0.63159800 | -1.81913400 |
| <b>P6</b> |             |             |             |
| C         | -1.47815000 | 1.50295600  | -0.98875000 |
| N         | -1.22241200 | 0.72665000  | -1.95351700 |
| C         | -0.63077500 | -0.46504000 | -1.28425000 |
| C         | -1.80437500 | -1.21836700 | -0.58500300 |
| C         | -2.06260100 | -0.29397300 | 0.65517800  |
| C         | -1.05137800 | 0.87154300  | 0.36395600  |
| N         | -1.98611900 | 2.87418500  | -1.18940700 |
| O         | -1.48587200 | 3.69616700  | -0.42190000 |

|   |             |             |             |
|---|-------------|-------------|-------------|
| O | -2.77945300 | 3.07028600  | -2.08596000 |
| N | 0.07221100  | 0.02461500  | -0.08310800 |
| N | 1.34394500  | 0.55616800  | -0.33776800 |
| C | 2.31535100  | 0.18019500  | 0.68558300  |
| N | -1.74772700 | -1.03086000 | 1.97358500  |
| O | -0.93821100 | -0.51758000 | 2.72472200  |
| O | -2.37105400 | -2.06272100 | 2.13487500  |
| N | -1.32677400 | -2.68379100 | -0.22879500 |
| O | -0.25237200 | -2.76421800 | 0.33583400  |
| O | -2.04387100 | -3.58701500 | -0.60226100 |
| N | -3.51609800 | 0.26828000  | 0.80174400  |
| O | -3.82690300 | 1.05391800  | -0.08274900 |
| O | -4.16246200 | -0.06098800 | 1.76400700  |
| N | -3.00535800 | -1.45709900 | -1.50037900 |
| O | -2.73657900 | -1.56901200 | -2.68345800 |
| O | -4.08808300 | -1.58765700 | -0.95689300 |
| C | 3.67655800  | -0.06372100 | 0.03428700  |
| N | 4.63218100  | -0.78875900 | 0.98552600  |
| O | 4.61884700  | -0.35401400 | 2.12819900  |
| O | 5.30991000  | -1.68820600 | 0.52955000  |
| N | 4.38047400  | 1.24066100  | -0.36598000 |
| O | 5.59510300  | 1.22747900  | -0.38833100 |
| O | 3.63636200  | 2.17333200  | -0.63897600 |
| N | 3.52497300  | -0.91436000 | -1.23206800 |
| O | 3.99881300  | -0.47694300 | -2.26325700 |
| O | 2.91254300  | -1.95550900 | -1.06372400 |
| N | -0.85013600 | 1.82595900  | 1.51025400  |
| O | 0.27914800  | 2.23814800  | 1.70738000  |
| O | -1.87153900 | 2.13727300  | 2.10053900  |
| H | -0.00906100 | -1.06509200 | -1.94158200 |

|           |             |             |             |
|-----------|-------------|-------------|-------------|
| H         | 1.34732000  | 1.55755700  | -0.51443900 |
| H         | 1.98846600  | -0.76363600 | 1.12394700  |
| H         | 2.43676800  | 0.91614100  | 1.48465800  |
| <b>P7</b> |             |             |             |
| C         | -0.40742400 | 1.26817300  | -0.94123700 |
| N         | -0.66216200 | 0.33702200  | -1.76854300 |
| C         | -0.95183600 | -0.79815100 | -0.87631000 |
| C         | -2.34644700 | -0.58661400 | -0.18199200 |
| C         | -1.99088000 | 0.56828700  | 0.81718000  |
| C         | -0.48067700 | 0.80476100  | 0.50861500  |
| N         | -0.01970900 | 2.63063400  | -1.35461300 |
| O         | -0.07694700 | 3.46901800  | -0.45915500 |
| O         | 0.33487500  | 2.78930000  | -2.50922000 |
| N         | -0.10899800 | -0.61852500 | 0.34220700  |
| N         | 1.19988500  | -1.01569000 | 0.48656200  |
| C         | 2.23875900  | -0.80824600 | -0.52350700 |
| N         | -2.79671200 | 1.88573500  | 0.61606800  |
| O         | -2.73822100 | 2.35009700  | -0.51359500 |
| O         | -3.33047000 | 2.36964400  | 1.58853500  |
| N         | -3.48296900 | -0.26964000 | -1.14838500 |
| O         | -3.30257000 | -0.59396900 | -2.30936100 |
| O         | -4.47897400 | 0.22289300  | -0.64810300 |
| N         | -0.74040800 | -2.10073400 | -1.61028200 |
| O         | -1.61391700 | -2.94856400 | -1.54973400 |
| O         | 0.32795600  | -2.18299900 | -2.19840500 |
| N         | -2.21246000 | 0.19664300  | 2.29567800  |
| O         | -3.31049100 | -0.26246700 | 2.55271000  |
| O         | -1.30160500 | 0.44267300  | 3.06518700  |
| N         | -2.82036900 | -1.93063900 | 0.54668700  |
| O         | -2.00527200 | -2.43335500 | 1.29391600  |

|            |             |             |             |
|------------|-------------|-------------|-------------|
| O          | -3.92516800 | -2.32645700 | 0.26327300  |
| C          | 3.50476900  | -0.24587300 | 0.13305200  |
| N          | 4.49946000  | 0.26316800  | -0.91651500 |
| O          | 4.69732200  | -0.52897800 | -1.82591800 |
| O          | 4.98910800  | 1.36241600  | -0.75046400 |
| N          | 4.26379800  | -1.30349800 | 0.94884300  |
| O          | 5.45255400  | -1.11464000 | 1.11226200  |
| O          | 3.58794500  | -2.23551200 | 1.36345800  |
| N          | 3.16426500  | 0.91249700  | 1.07004900  |
| O          | 3.61083300  | 0.88800900  | 2.19763900  |
| O          | 2.44180800  | 1.76353600  | 0.56597100  |
| H          | 0.06284200  | 1.35045000  | 1.27212300  |
| H          | 1.25655300  | -1.90248400 | 0.97097200  |
| H          | 1.91039500  | -0.09247400 | -1.27504900 |
| H          | 2.51716300  | -1.72349400 | -1.04911900 |
| <b>TS1</b> |             |             |             |
| C          | 1.50566000  | -0.97657300 | 0.18211300  |
| N          | 0.81727700  | -2.02670800 | 0.46983900  |
| C          | -0.34956500 | -1.51665700 | 1.03500700  |
| C          | -1.25035600 | -1.14873300 | -0.61295700 |
| C          | -0.56552200 | -0.05830200 | -1.19043900 |
| C          | 0.84672900  | 0.22287700  | 0.59849000  |
| N          | 2.68736500  | -1.01968600 | -0.67612800 |
| O          | 3.40648200  | -1.98372200 | -0.58288300 |
| O          | 2.80396900  | -0.06956100 | -1.42837400 |
| N          | 1.43604100  | 1.55769600  | 0.70110300  |
| O          | 2.62286700  | 1.57780000  | 0.95048100  |
| O          | 0.69088900  | 2.49561700  | 0.54463700  |
| N          | -1.14576800 | 1.26685100  | -1.14005800 |
| O          | -0.77880300 | 2.05883100  | -1.97836700 |

|   |             |             |             |
|---|-------------|-------------|-------------|
| O | -1.94966300 | 1.50084800  | -0.24314300 |
| N | -2.69171800 | -0.97411300 | -0.22314800 |
| O | -2.98624400 | -0.94858200 | 0.95782400  |
| O | -3.46472100 | -0.92685900 | -1.14867600 |
| N | -0.09988300 | -0.20483000 | 1.46190100  |
| N | -0.86277200 | 0.63632500  | 2.26584700  |
| H | -0.99479400 | -2.14926400 | 1.63191900  |
| H | -1.16637700 | -2.09319300 | -1.14150300 |
| H | 0.10136200  | -0.17550800 | -2.03390600 |
| H | -1.08342100 | 0.12304700  | 3.11465900  |
| H | -1.72044500 | 0.87554100  | 1.76806300  |

**TS2**

|   |             |             |             |
|---|-------------|-------------|-------------|
| C | -1.77013600 | 0.68745000  | 0.10805900  |
| N | -0.96552500 | 1.49173600  | -0.49766100 |
| C | 0.26338400  | 1.11552600  | 0.03359100  |
| C | 0.61616700  | -0.32176500 | -1.04652600 |
| C | -0.35422900 | -1.30938800 | -0.73405400 |
| C | -1.14537900 | -0.07914300 | 1.14442100  |
| N | -3.18146800 | 0.53980200  | -0.25792600 |
| O | -3.74993600 | -0.39137700 | 0.28259500  |
| O | -3.63966200 | 1.32923000  | -1.04626000 |
| N | 0.00245400  | -2.43296200 | 0.08918900  |
| O | 0.93066500  | -2.28744800 | 0.88478700  |
| O | -0.65856500 | -3.44350000 | -0.02702300 |
| N | 2.06342200  | -0.68254500 | -0.83465300 |
| O | 2.69567700  | -0.08262100 | 0.01477300  |
| O | 2.49043600  | -1.52761200 | -1.57971300 |
| N | 0.04947800  | 0.50401100  | 1.29614900  |
| N | 0.95076400  | 0.16950100  | 2.30534300  |
| N | 1.32676700  | 2.14114700  | -0.08820500 |

|   |             |             |             |
|---|-------------|-------------|-------------|
| O | 1.63909600  | 2.42426600  | -1.21953300 |
| O | 1.76171000  | 2.61065600  | 0.94176100  |
| H | 0.54014300  | 0.11646700  | -2.03856800 |
| H | -1.17294600 | -1.53774400 | -1.40151300 |
| H | -1.56484800 | -0.76584800 | 1.86707800  |
| H | 1.48518600  | 1.01537000  | 2.49520600  |
| H | 1.57701800  | -0.55192100 | 1.94810300  |

**TS3**

|   |             |             |             |
|---|-------------|-------------|-------------|
| C | -2.86931100 | 0.74351900  | -1.00856100 |
| N | -2.50282400 | 0.05566200  | -2.03424600 |
| C | -1.21893600 | -0.39057200 | -1.70986100 |
| C | -1.84206400 | -1.90934000 | -0.64635100 |
| C | -2.38760800 | -1.32520000 | 0.51452000  |
| C | -1.84109600 | 0.77246800  | -0.00714300 |
| N | -4.26193100 | 1.16651700  | -0.83847200 |
| O | -4.70866500 | 1.91272400  | -1.67385600 |
| O | -4.83707100 | 0.68438900  | 0.11730500  |
| N | -0.71217100 | 0.38653600  | -0.67695300 |
| N | 0.61104000  | 0.79860600  | -0.56340800 |
| C | 1.45904500  | 0.09123400  | 0.39838300  |
| N | -1.64693000 | -1.29139700 | 1.75818600  |
| O | -0.44312600 | -1.50924500 | 1.70620100  |
| O | -2.26830800 | -0.99293300 | 2.75639200  |
| N | -0.65995900 | -2.82266600 | -0.51880100 |
| O | 0.40511000  | -2.47344600 | -0.98979300 |
| O | -0.89765200 | -3.88499800 | 0.00233800  |
| C | 2.89877200  | 0.35757900  | -0.00225000 |
| N | 3.86049300  | -0.59178700 | 0.68663200  |
| O | 3.59990100  | -0.79976800 | 1.84957400  |
| O | 4.78625100  | -1.00299200 | 0.03636800  |

|            |             |             |             |
|------------|-------------|-------------|-------------|
| N          | 3.36634300  | 1.75925000  | 0.35751300  |
| O          | 4.53506200  | 1.90013900  | 0.60219600  |
| O          | 2.50018000  | 2.60944000  | 0.34303900  |
| N          | 3.07258000  | 0.19612600  | -1.50274800 |
| O          | 2.73999100  | -0.88424600 | -1.92131900 |
| O          | 3.48913400  | 1.14968000  | -2.11305700 |
| N          | -1.79406900 | 1.60948500  | 1.17530700  |
| O          | -2.78765400 | 2.25633600  | 1.41573200  |
| O          | -0.76323600 | 1.56574500  | 1.82171100  |
| H          | -0.53418200 | -0.75104000 | -2.46753900 |
| H          | -2.55461500 | -2.37806900 | -1.31788500 |
| H          | -3.45322500 | -1.21804800 | 0.67244800  |
| H          | 0.61965600  | 1.79823700  | -0.37417100 |
| H          | 1.29574900  | -0.98017200 | 0.28962300  |
| H          | 1.30648600  | 0.38004200  | 1.44137900  |
| <b>TS4</b> |             |             |             |
| C          | 2.71071800  | 1.07373400  | 0.78135700  |
| N          | 3.06646200  | -0.14103900 | 1.03220400  |
| C          | 1.89261300  | -0.84146700 | 0.80688000  |
| C          | 2.09311400  | -0.95102100 | -1.08835400 |
| C          | 1.86365300  | 0.36655700  | -1.54461700 |
| C          | 1.30977500  | 1.22227200  | 0.53449700  |
| N          | 3.67305900  | 2.17023400  | 0.66241300  |
| O          | 3.25358300  | 3.14990600  | 0.07314200  |
| O          | 4.76808800  | 2.00574400  | 1.14053800  |
| N          | 0.79315800  | 0.03752600  | 0.93557700  |
| N          | -0.49881500 | -0.14513400 | 1.41019800  |
| C          | -1.49324600 | -0.80568000 | 0.57333600  |
| N          | 0.60416000  | 0.73127700  | -2.14554000 |
| O          | -0.33781400 | -0.04764100 | -2.00509500 |



|            |             |             |             |
|------------|-------------|-------------|-------------|
| O          | 0.54788500  | 1.79318900  | -2.72266800 |
| N          | 1.19561600  | -2.05822600 | -1.55509300 |
| O          | 0.44613300  | -2.58167300 | -0.75151800 |
| O          | 1.34721000  | -2.37792800 | -2.70610400 |
| C          | -2.65879600 | 0.14495400  | 0.31656600  |
| N          | -3.85054300 | -0.61157200 | -0.24196900 |
| O          | -3.56656600 | -1.49323000 | -1.01728800 |
| O          | -4.94232000 | -0.25502400 | 0.12633900  |
| N          | -2.34134300 | 1.25704200  | -0.66711700 |
| O          | -3.04918600 | 1.35523800  | -1.63153400 |
| O          | -1.38823500 | 1.94195100  | -0.36599300 |
| N          | -3.12708300 | 0.80501900  | 1.60217000  |
| O          | -3.11172200 | 0.07469200  | 2.56866300  |
| O          | -3.49139900 | 1.94964800  | 1.53762000  |
| N          | 1.84140700  | -2.18833700 | 1.41445600  |
| O          | 2.71338400  | -2.94296300 | 1.06388700  |
| O          | 0.95190800  | -2.40263200 | 2.21346100  |
| H          | 3.11409700  | -1.31397600 | -1.16186300 |
| H          | 2.66420100  | 1.01493000  | -1.87256000 |
| H          | 0.71133700  | 2.11545500  | 0.41661200  |
| H          | -0.41640100 | -0.60945300 | 2.30902700  |
| H          | -1.89980000 | -1.67600700 | 1.09402400  |
| H          | -1.10055600 | -1.13877500 | -0.38191600 |
| <b>TS5</b> |             |             |             |
| C          | -1.73076100 | 1.48728900  | -1.16367800 |
| N          | -1.77369700 | 0.42545400  | -1.93461500 |
| C          | -0.79159600 | -0.37938500 | -1.49863900 |
| C          | -2.00610600 | -1.42311400 | -0.06561500 |
| C          | -2.57024900 | -0.47051200 | 0.74433500  |
| C          | -0.61071800 | 1.48282500  | -0.28164300 |

|   |             |             |             |
|---|-------------|-------------|-------------|
| N | -2.73037100 | 2.54503500  | -1.25396800 |
| O | -2.45507700 | 3.57982100  | -0.67703600 |
| O | -3.73157800 | 2.29377500  | -1.88209600 |
| N | 0.02315100  | 0.32995700  | -0.59401900 |
| N | 1.20711200  | -0.05945600 | 0.01007400  |
| C | 2.22459200  | -0.43198900 | -0.96672500 |
| N | -1.95716700 | -0.13683800 | 2.01553900  |
| O | -0.72477400 | -0.21612500 | 2.05531400  |
| O | -2.66301600 | 0.16911000  | 2.93788300  |
| N | -1.02893200 | -2.39248400 | 0.56572000  |
| O | -0.00282300 | -2.62456500 | -0.05023500 |
| O | -1.38621700 | -2.90718200 | 1.59013400  |
| N | -3.81278500 | 0.19199700  | 0.37841400  |
| O | -4.41128400 | -0.31422200 | -0.55231300 |
| O | -4.11006900 | 1.21080600  | 0.96296800  |
| N | -2.85314800 | -2.30258700 | -0.98968300 |
| O | -2.65572000 | -2.24892800 | -2.17396900 |
| O | -3.58235700 | -3.04519700 | -0.38106200 |
| C | 3.59284000  | -0.15511500 | -0.36678000 |
| N | 4.67762000  | -0.14379700 | -1.42401800 |
| O | 4.57362000  | -1.03235500 | -2.23972800 |
| O | 5.52203500  | 0.70828600  | -1.33663600 |
| N | 3.99634500  | -1.20193800 | 0.65723600  |
| O | 3.07241900  | -1.69209100 | 1.26941800  |
| O | 5.17247900  | -1.42481900 | 0.76992400  |
| N | 3.60832700  | 1.19482600  | 0.32783700  |
| O | 3.14718000  | 2.09537500  | -0.33510600 |
| O | 4.05386500  | 1.23508600  | 1.44497300  |
| N | -0.28147700 | 2.41734800  | 0.63542900  |
| N | 0.64403600  | 2.16868300  | 1.45690000  |

|            |             |             |             |
|------------|-------------|-------------|-------------|
| N          | 1.40504000  | 2.15528100  | 2.27437000  |
| H          | -0.40235600 | -1.21835500 | -2.05891300 |
| H          | 1.02816000  | -0.80819800 | 0.67746700  |
| H          | 2.12206500  | 0.21281300  | -1.84265400 |
| H          | 2.18630800  | -1.48081100 | -1.27940100 |
| <b>TS6</b> |             |             |             |
| C          | 2.18228500  | -1.11958900 | -1.21305300 |
| N          | 1.78200100  | -0.23375500 | -2.05716100 |
| C          | 0.51813900  | 0.11961100  | -1.63136200 |
| C          | 1.30629600  | 1.44809000  | -0.15267100 |
| C          | 1.72954700  | 0.51467700  | 0.81819200  |
| C          | 1.21098400  | -1.31084500 | -0.16115900 |
| N          | 3.49087200  | -1.77677200 | -1.33395200 |
| O          | 3.67428000  | -2.68188800 | -0.54238700 |
| O          | 4.22086500  | -1.38654000 | -2.20531300 |
| N          | 0.04988900  | -0.79928200 | -0.72482200 |
| N          | -1.27020000 | -1.20906000 | -0.61789600 |
| C          | -2.06651800 | -0.74740000 | 0.51216700  |
| N          | 0.99437600  | 0.45154500  | 2.13333900  |
| O          | 0.21867900  | -0.46496600 | 2.31018900  |
| O          | 1.25894300  | 1.34450300  | 2.89047000  |
| N          | 0.08133800  | 2.26199400  | 0.07282500  |
| O          | -0.68431200 | 1.88569800  | 0.93959000  |
| O          | -0.06982600 | 3.21045300  | -0.65448800 |
| N          | 3.19662000  | 0.35443100  | 1.06373400  |
| O          | 3.89912400  | 0.46105300  | 0.07594400  |
| O          | 3.54363700  | 0.08818300  | 2.18226000  |
| N          | 2.31316900  | 2.37652500  | -0.79722600 |
| O          | 2.35872700  | 2.41858600  | -1.99679200 |
| O          | 2.91399900  | 3.05684000  | 0.00361600  |

|   |             |             |             |
|---|-------------|-------------|-------------|
| C | -3.39108000 | -0.23013100 | -0.03613900 |
| N | -4.08834300 | 0.68698800  | 0.94337500  |
| O | -4.09786200 | 0.26293200  | 2.07673100  |
| O | -4.56758900 | 1.70185600  | 0.50944400  |
| N | -4.36003900 | -1.35945300 | -0.34386200 |
| O | -5.53297500 | -1.11875900 | -0.22972900 |
| O | -3.83299900 | -2.39227200 | -0.69695100 |
| N | -3.18098600 | 0.53654000  | -1.32958200 |
| O | -3.88623300 | 0.25628000  | -2.26137300 |
| O | -2.29534200 | 1.36268800  | -1.28254200 |
| N | 1.16462600  | -2.42030500 | 0.80023500  |
| O | 0.25502600  | -3.21199500 | 0.63730400  |
| O | 2.01823800  | -2.43782100 | 1.64578100  |
| H | -0.16378400 | 0.70816600  | -2.23596400 |
| H | -1.29971500 | -2.21946300 | -0.72198100 |
| H | -1.57360400 | 0.07423200  | 1.02189800  |
| H | -2.26909900 | -1.53383400 | 1.24311200  |

**TS7**

|   |             |             |             |
|---|-------------|-------------|-------------|
| C | -1.33412100 | 1.47461000  | -1.22651900 |
| N | -1.62157000 | 0.44489700  | -1.95917000 |
| C | -0.85379000 | -0.53815400 | -1.40611700 |
| C | -2.26659000 | -0.83198700 | 0.25807600  |
| C | -1.79427500 | 0.24342700  | 1.03320100  |
| C | -0.40218500 | 1.17236200  | -0.17701500 |
| N | -1.95944900 | 2.78595300  | -1.40137000 |
| O | -1.68736200 | 3.58494600  | -0.52343100 |
| O | -2.64892000 | 2.94984700  | -2.37384600 |
| N | 0.14445600  | -0.01752900 | -0.62202600 |
| N | 1.26349500  | -0.59774600 | -0.05600900 |
| C | 2.44019300  | -0.57498600 | -0.91348200 |

|   |             |             |             |
|---|-------------|-------------|-------------|
| N | -2.74096200 | 1.35609000  | 1.34818100  |
| O | -3.51149800 | 1.65565100  | 0.46069400  |
| O | -2.61597200 | 1.87584500  | 2.42723700  |
| N | -3.71895900 | -0.86599100 | -0.15054100 |
| O | -3.98140600 | -0.88668000 | -1.32210700 |
| O | -4.47432900 | -0.92181200 | 0.79330200  |
| N | -0.67230100 | -1.83461100 | -2.07664700 |
| O | -1.67114200 | -2.46551100 | -2.31131400 |
| O | 0.48010300  | -2.14159300 | -2.31728800 |
| N | -0.99994500 | -0.07555900 | 2.28366200  |
| O | -1.58148800 | -0.79198200 | 3.06070300  |
| O | 0.08874200  | 0.43137900  | 2.41221100  |
| N | -1.84703300 | -2.20606700 | 0.59130700  |
| O | -0.66230100 | -2.34723800 | 0.86893800  |
| O | -2.66768300 | -3.07776800 | 0.51251800  |
| C | 3.58620200  | 0.01888600  | -0.10311300 |
| N | 4.73882400  | 0.45507600  | -0.97782500 |
| O | 5.02794600  | -0.35329500 | -1.83279900 |
| O | 5.25297600  | 1.51623100  | -0.73864700 |
| N | 4.15782100  | -0.97254700 | 0.89569000  |
| O | 5.29608400  | -0.78689000 | 1.24034400  |
| O | 3.39410900  | -1.84148400 | 1.25245900  |
| N | 3.09199100  | 1.22315600  | 0.67301500  |
| O | 3.28704500  | 1.24908600  | 1.85666400  |
| O | 2.51117000  | 2.03670200  | -0.01601600 |
| H | 0.15404500  | 1.84972400  | 0.45881600  |
| H | 1.05481000  | -1.49750700 | 0.36597400  |
| H | 2.26337500  | 0.07501400  | -1.77210200 |
| H | 2.73201100  | -1.56149700 | -1.27772400 |
